# Supplementary material for: Generation of Herbicide-Resistant Soybean by Base Editing
Source: MDPI journal article supplement (doi:10.3390/biology12050741), 2023-05-19
Supplement: s1 [file s1]

**Table S1 Primers used in this study.**

| Name                                                                            | Sequence (5' - 3')        |
|---------------------------------------------------------------------------------|---------------------------|
| Primers for construction of vectors and identification of transgenic plants     |                           |
| GmAHAS2-P182-F                                                                  | ATTGAGGTCCCCCGGCGCATGAT   |
| GmAHAS2-P182-R                                                                  | AAACATCATGCGCCGGGGGACCT   |
| GmAHAS3-P172-F                                                                  | ATTGAGGTCCCCCGCCGCATGAT   |
| GmAHAS3-P172-R                                                                  | AAACATCATGCGGCGGGGGACCT   |
| U6-26p-F                                                                        | TGTCCAGGATTAGAATGATTAGGC  |
| U6-26t-R                                                                        | CCCCAGAAATTGAACGCCGAAGAAC |
| Cas9-F                                                                          | GAGAGAAGGTCCTCCCAAAGC     |
| Cas9-R                                                                          | GACCTTATCGTCGAACAGATGC    |
| Bar-F                                                                           | GCACCATCGTCAACCACTACATC   |
| Bar-R                                                                           | ACTGCCAGAAACCCACGTCAT     |
| Primers for amplification of the target sequences for sequencing                |                           |
| GmAHAS1-P178-DF                                                                 | ACAAGGAAGCGCCGACCAC       |
| GmAHAS1-P178-DR                                                                 | CCGCAACGGGAATACCAAGTG     |
| GmAHAS2-P182-DF                                                                 | CTGCAGCGCCGGCAACAT        |
| GmAHAS2-P182-DR                                                                 | CGGCGAGTTGCTGTTGGACG      |
| GmAHAS3-P172-DF                                                                 | GATCCCTTTGTGCGTTTCGC      |
| GmAHAS3-P172-DR                                                                 | GGGGCTTAGGCAACCTAGACG     |
| GmAHAS4-P180-DF                                                                 | CCTCCCTCCCAAACAGTTCCT     |
| GmAHAS4-P180-DR                                                                 | TCCCTTAGCATAAACAGTCCCG    |
| Glyma02g06360-F                                                                 | CTTCACAATGCTCCTAATCCA     |
| Glyma02g06360-R                                                                 | CAACACCAACCCTAGACCC       |
| Glyma07g02610-F                                                                 | GGGCTGAAATTGCAGACGC       |
| Glyma07g02610-R                                                                 | CCGCCAGTCAGGTAGTAGCAGT    |
| Glyma07g05680-F                                                                 | GGTTCAAGGACAGACCAGGAT     |
| Glyma07g05680-R                                                                 | CCTAACATTGTGACCCCTAACC    |
| Glyma11g31450-F                                                                 | GGGGTAGACCTGGAGGATTATGT   |
| Glyma11g31450-R                                                                 | TCCCCTATACCACCCTCTTCTTT   |
| Glyma14g11260-F                                                                 | CAGCAGAGCACCTCCCAAGA      |
| Glyma14g11260-R                                                                 | GCAAACAACGCCAGACACG       |
| Glyma15g03350-F                                                                 | GCGTGCTCATTTCGGAGATTC     |
| Glyma15g03350-R                                                                 | CGCTCCCACAGCATTAGACG      |
| Glyma15g40520-F                                                                 | CAGCCCCGAGACAGTATCCAA     |
| Glyma15g40520-R                                                                 | AGCTTCAAATGCAGCGACCTC     |
| Primers for identification of GmAHAS4 P180S homozygous and heterozygous mutants |                           |
| GmAHAS4-P180-F                                                                  | CCTCCCTCCCAAACAGTTCCT     |
| GmAHAS4-180P-R                                                                  | TGCCGATCATGCGGCGGGG       |
| GmAHAS4-180S-R                                                                  | TGCCGATCATGCGGCGGGAA      |
| 18S RNA-F                                                                       | CCTTGCTTGTTGCTTTACTAAATAG |
| 18S RNA-R                                                                       | ATGCACCTTTTCGTTTGTTCGGAG  |

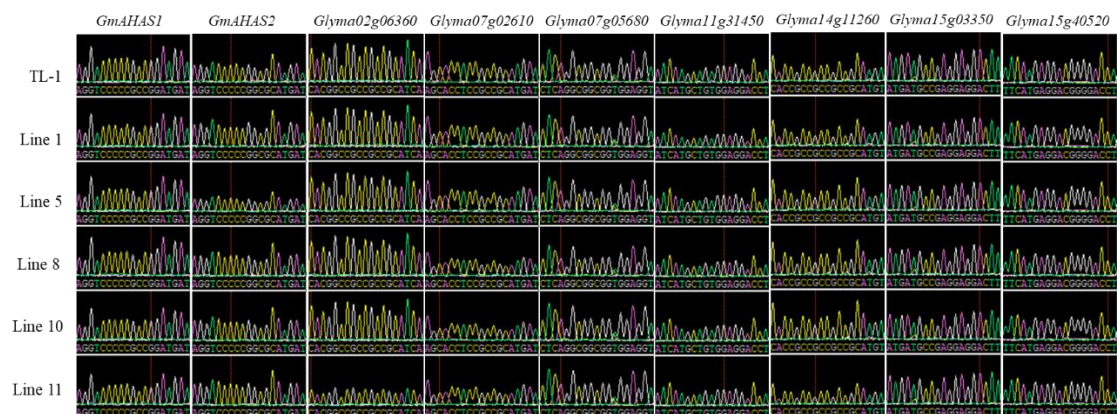

**Figure S1 Off-target detection of 5 T0 mutants.**

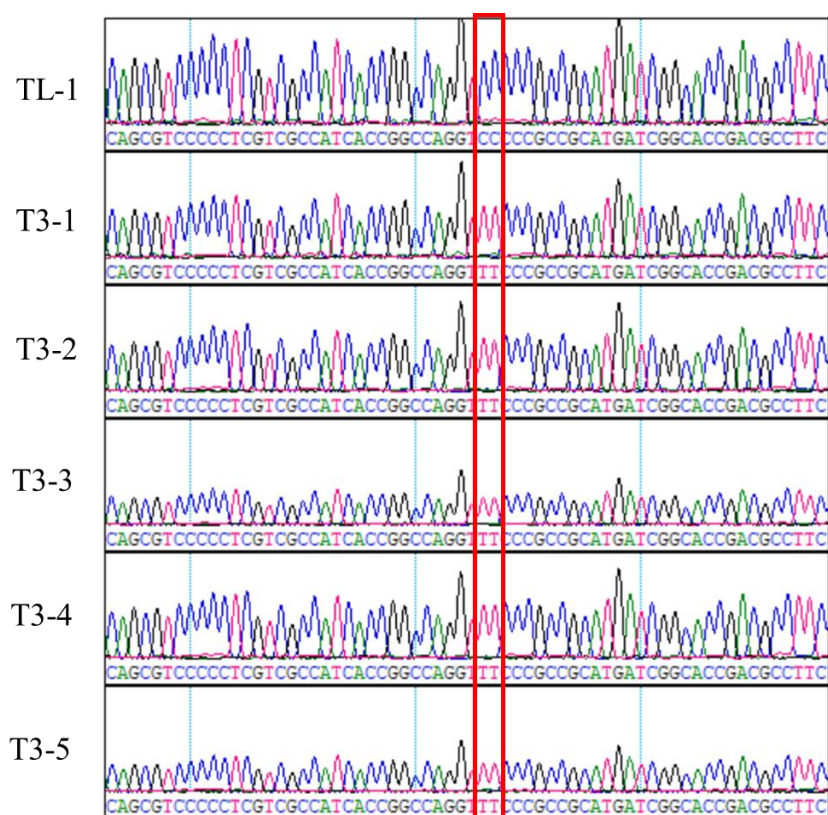

**Figure S2 Chromatograms of Sanger sequencing results of T3 generation of GmAHAS4 P180S plants.**

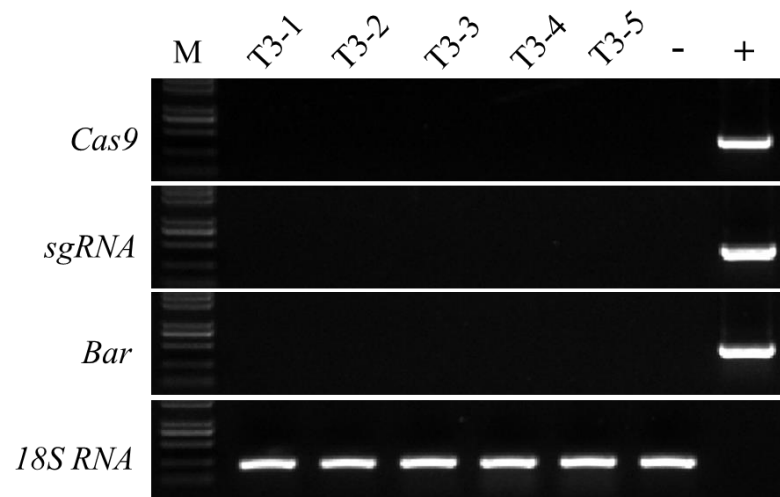

**Figure S3 PCR identification T3 generation of transgene-free GmAHAS4 P180S plants.**

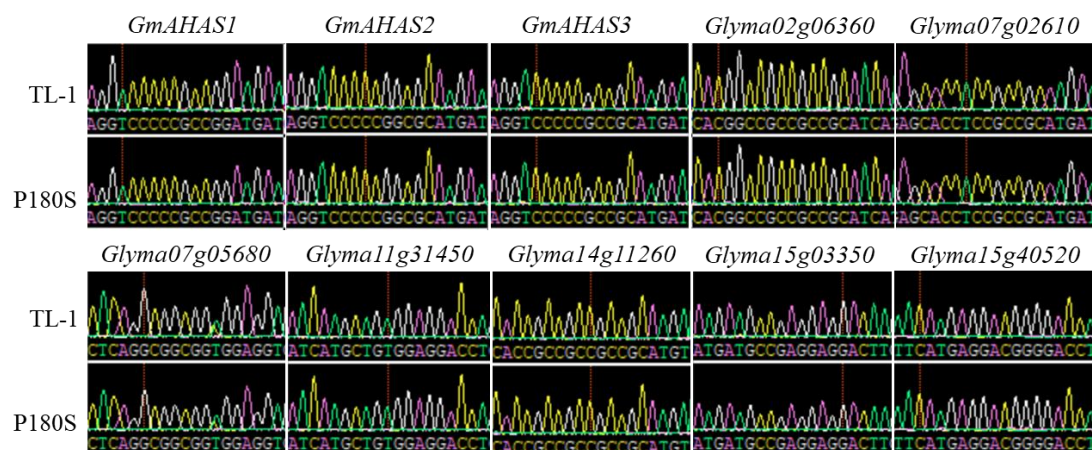

**Figure S4 Off-target detection of T3 GmAHAS4 P180S mutants.**
